# Supplementary material for: Infection Was Associated With Intensive Care Unit Pediatric Delirium in&nbsp;Children&nbsp;Younger Than 2 Years&nbsp;Old: A Single-Center Observational Study
Source: Research Square preprint supplement (doi:10.21203/rs.3.rs-113633/v1), 2020-12-04
Supplement: Supplementary file 1 [file 016346117db6c83462c5a760.docx]

| **Table 2 Univariable Logistic Regression Results** | | | | | | | |
| --- | --- | --- | --- | --- | --- | --- | --- |
| **Variable** |  | **OR** | **95%CI** | **Variable** |  | **OR** | **95%CI** |
| **Demographics** | |  |  | **Treatment and Nursing** | | |  |
| Age* | 1-3 m | 6.72 | 2.84-15.94 | Mechanical Ventilation * | Yes | 7.76 | 5.13-11.76 |
|  | 3-6 m | 3.11 | 1.47-6.59 | No | 1（Ref） | — |
|  | 6-12 m | 5.29 | 2.31-12.15 | Sedation drug* | Yes | 1.87 | 1.34-2.63 |
|  | 1-2 y | 4.61 | 1.97-10.79 |  | No | 1（Ref） | — |
|  | 2-5 y | 3.01 | 1.36-6.68 | Analgesic drug | Yes | — | — |
|  | 5-7 y | 1（Ref） | — |  | No | 1（Ref） | — |
| Sex | male | 1（Ref） | — | Sleep improvement | Yes | — | — |
|  | female | — | — | No | 1（Ref） | — |
| Disease category * | General Surgery disease | 1（Ref） | — | Restrict* | Yes | 3.37 | 1.57-7.22 |
| Medical disease | 1.2 | 0.83-1.74 |  | No | 1（Ref） | — |
|  | Cardiac surgery disease | 2.19 | 1.33-3.59 | **Clinical indicators** | |  |  |
| Operation | Yes | — | — | Cancer | Yes | — | — |
|  | No | 1（Ref） | — |  | No | 1（Ref） | — |
| Gestational age | Preterm | 1（Ref） | — | Head injury | Yes | — | — |
| Full term | — | — |  | No | 1（Ref） | — |
|  | Post term | — | — | Pain | Yes | — | — |
| ICU detention time(day) * | 1-3 | 1（Ref） | — |  | No | 1（Ref） | — |
| 3-5 | 1.42 | 0.86-2.32 | Transient syncope pre-admission | Yes | — | — |
| 5-7 | 2.21 | 1.26-3.67 | No | 1（Ref） | — |
|  | ＞7 | 6.86 | 4.37-10.77 | PRISM IV score* | ＜5 | 1（Ref） | — |
| **Laboratory results** | |  |  | 5-10 | 6.71 | 4.45-10.11 |
| Renal dysfunction* | Yes | 5.83 | 4.00-8.50 |  | ≥10 | 13.62 | 5.32-34.87 |
| No | 1（Ref） | — | Pre-ICU CPR* | Yes | 4.57 | 1.54-13.55 |
| Hypoxia* | Yes | 5.98 | 4.15-8.63 |  | No | 1（Ref） | — |
|  | No | 1（Ref） | — | Previous ICU admission* | Yes | 1.69 | 1.02-2.82 |
| Infection* | Yes | 8.54 | 5.72-12.75 | No | 1（Ref） | — |
|  | No | 1（Ref） | — | Emergency check-in ICU* | Yes | 1.53 | 1.04-2.25 |
| Hypoxia + Infection | Both | 1.12 | 0.76-1.64 | No | 1（Ref） | — |
| Neither | 1（Ref） | — |  |  |  |  |
| **P*＜0.05 |  |  |  |  |  |  |  |
