# Supplementary material for: Infection Was Associated With Intensive Care Unit Pediatric Delirium in&nbsp;Children&nbsp;Younger Than 2 Years&nbsp;Old: A Single-Center Observational Study
Source: Research Square preprint supplement (doi:10.21203/rs.3.rs-113633/v1), 2020-12-04
Supplement: Supplementary file 4 [file 686df23938c7c90c0ad82157.docx]

| **Table 3 Multivariable Logistic Regression Model for Association of Hypoxia and Infection with Intensive Care Unit Pediatric Delirium Based on Age** | | | | |
| --- | --- | --- | --- | --- |
| **Variable** | **<2 y** | | **≥2 y** | |
| **OR** | **95%CI** | **OR** | **95%CI** |
| **Infection** | 5.37 | 3.09-9.33 | — | — |
| **Hypoxia** | 2.79 | 1.61-4.84 | 3.62 | 1.46-9.01 |
