# Supplementary material for: Infection Was Associated With Intensive Care Unit Pediatric Delirium in&nbsp;Children&nbsp;Younger Than 2 Years&nbsp;Old: A Single-Center Observational Study
Source: Research Square preprint supplement (doi:10.21203/rs.3.rs-113633/v1), 2020-12-04
Supplement: Supplementary file 5 [file d0c5380c167bf518a0573899.docx]

| **Table 1 Demographics, Laboratory results, and Clinical Characteristics of the Study Population** | | | | | | | | |
| --- | --- | --- | --- | --- | --- | --- | --- | --- |
| **Variable** | | **Number, N=639 (%)** | **Delirium, N=200 (%)** | **Variable** | |  | **Number, N=639 (%)** | **Delirium, N=200 (%)** |
| **Demographics** | |  |  | **Laboratory results** | | |  |  |  |
| Age | 1-3 m | 59(9.23%) | 28(14%) | Renal dysfunction | | | 175(27.39%) | 105(52.50%) |
|  | 3-6 m | 234(36.62%) | 69(34.50%) | Hypoxia | | | 213(33.33%) | 122(61.00%) |
|  | 6-12 m | 77(12.05%) | 32(16.00%) | Infection | | | 300(46.95%) | 160(80.00%) |
|  | 1-2 y | 68(10.64%) | 26 (13.00%) | **Treatment and Nursing** | | |  |  |
|  | 2-5 y | 125(19.56%) | 36(18.00%) | Mechanical Ventilation | | | 139(21.75%) | 94(47.00%) |
|  | 5-7 y | 76(11.89%) | 9(4.50%) | Sedation drug | | | 271(42.41%) | 106(53.00%) |
| Sex | male | 348(54.46%) | 110(55.00%) | Analgesic drug | | | 28(4.38%) | 12(6.00%) |
| Disease category | General Surgery disease | 349(54.62%) | 97(48.50%) | Sleep improvement | | | 49(7.67%) | 16(8.00%) |
|  | Medical disease | 209(32.71%) | 66 (33.00%) | Restrict | | | 577(90.30%) | 192(96.00%) |
|  | Cardiac surgery disease | 81(12.68%) | 37(18.50%) | **Clinical indicators** | | |  |  |
| Operation | | 431(67.45%) | 134(67.00%) | Cancer | | | 111(17.37%) | 29(14.50%) |
| Gestational age | Preterm | 59(9.23%) | 22 (11.00%) | Head injury | | | 7(1.10%) | 3(1.50%) |
| Full term | 579(90.61%) | 178(89.00%) | Pain | | | 576 (90.14%) | 178(89.00%) |
|  | Post term | 1(0.16%) | 0(0.00%) | Transient syncope before admission | | | 60(9.39%) | 20(10.00%) |
| ICU detention time(day) | 1-3 | 319(49.92%) | 63(31.50%) | PRISM IV score | ＜5 | | 473(74.02%) | 93(46.50%) |
| 3-5 | 120(18.78%) | 31(15.50%) | 5-10 | | 140(21.91%) | 87(43.50%) |
| 5-7 | 71(11.11%) | 25(12.50%) | ≥10 | | 26(4.07%) | 20(10.00%) |
|  | ＞7 | 129 (20.19%) | 81(40.50%) | Pre-ICU CPR | | | 15(2.35%) | 10(5.00%) |
|  |  |  |  | Previous ICU admission | | | 69(10.80%) | 29(14.50%) |
|  | |  |  | Emergency check-in ICU | | | 145(22.69%) | 56(28.00%) |
